# Supplementary material
Source: MDPI journal article supplement (https://www.mdpi.com/2073-4395/10/4/493)
Supplement: s1 [file s1]

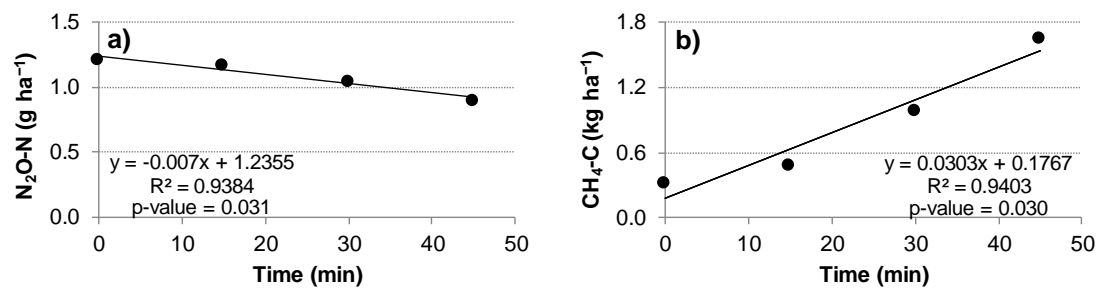

**Figure S1.** (a) N<sub>2</sub>O and (b) CH<sub>4</sub> concentrations over time on 6 August 2014 for a replicate of the PS170M0 treatment in site 2 (Grañén).
