# Supplementary material
Source: MDPI journal article supplement (https://www.mdpi.com/2073-4395/10/4/493)
Supplement: s1 [file s1]

**Table S1.** Grain yield (14 % moisture) for the different N fertilization treatments in site 1 (Villanueva de Sigena) and site 2 (Grañén).

| Site 1         |      |                     | Site 2         |      |                     |
|----------------|------|---------------------|----------------|------|---------------------|
|                |      | Grain yield         |                |      | Grain yield         |
|                |      | kg ha <sup>-1</sup> |                |      | kg ha <sup>-1</sup> |
| Treatments (T) | **   |                     | Treatments (T) | **   |                     |
| Control (C)    | 2220 | b                   | Control (C)    | 5766 | ab                  |
| M120M60        | 5241 | a                   | M170M0         | 4554 | b                   |
| PS120M60       | 5187 | a                   | PS170M0        | 7012 | a                   |
| PS170M0        | 5705 | a                   |                |      |                     |

\*\* p<0.01

Different letters in the same column indicate significant differences between treatments.

**Table S2.** N, P<sub>2</sub>O<sub>5</sub> (Olsen) and K<sub>2</sub>O (ammonium acetate) amounts in the 0–0.3 m soil depth at the beginning of each experiment and the nutrient amounts applied with the fertilizers (PS or mineral).

| Site | Treatments  | Soil                                                                       |                               |                  | Fertilizer                      |                               |                  |
|------|-------------|----------------------------------------------------------------------------|-------------------------------|------------------|---------------------------------|-------------------------------|------------------|
|      |             | Mineral N<br>(NH <sub>4</sub> <sup>+</sup> +NO <sub>3</sub> <sup>-</sup> ) | P <sub>2</sub> O <sub>5</sub> | K <sub>2</sub> O | NH <sub>4</sub> <sup>+</sup> -N | P <sub>2</sub> O <sub>5</sub> | K <sub>2</sub> O |
|      |             | (kg ha <sup>-1</sup> )                                                     |                               |                  | (kg ha <sup>-1</sup> )          |                               |                  |
| 1    | Control (C) | 37                                                                         | 58                            | 396              | 0                               | 100                           | 100              |
|      | M120M60     | 37                                                                         | 58                            | 396              | 180                             | 100                           | 100              |
|      | PS120M60    | 37                                                                         | 58                            | 396              | 169                             | 146                           | 127              |
|      | PS170M0     | 37                                                                         | 58                            | 396              | 165                             | 222                           | 194              |
| 2    | Control (C) | 60                                                                         | 367                           | 1094             | 0                               | 100                           | 100              |
|      | M170M0      | 60                                                                         | 367                           | 1094             | 170                             | 100                           | 100              |
|      | PS170M0     | 60                                                                         | 367                           | 1094             | 171                             | 27                            | 177              |
